# Supplementary material for: ube3d, a New Gene Associated with Age-Related Macular Degeneration, Induces Functional Changes in Both In Vivo and In Vitro Studies
Source: PubMed Central journal article supplement — Mol Ther Nucleic Acids. 2020 Feb 28;20:217–30. doi: 10.1016/j.omtn.2020.02.010 (PMC7090285; doi:10.1016/j.omtn.2020.02.010), 2020-02-28
Supplement: mmc1.pdf [file mmc1.pdf]

OMTN, Volume 20

## Supplemental Information

### ***ube3d*, a New Gene Associated with Age-Related Macular Degeneration, Induces Functional Changes in Both *In Vivo* and *In Vitro* Studies**

Huika Xia, Qi Zhang, Yan Shen, Yujing Bai, Xiaoyun Ma, Bo Zhang, Yun Qi, Jingjing Zhang, Qinrui Hu, Wei Du, Li Zhu, Peng Zhou, Bin Wang, Hui Xu, Lvzhen Huang, and Xiaoxin Li

## Supplementary Material

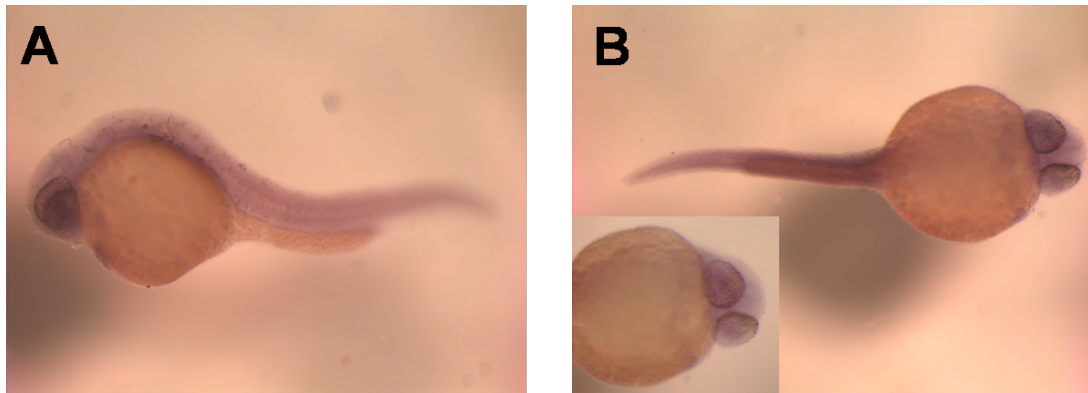

**Fig S1. The spatial specificity of ube3d expression in Zebrafish.** (A) Side bitmap of ube3d expression in Whole embryo in situ hybridization (WISH) of 24 hpf wild-type zebrafish. (B)Supine bitmap of ube3d expression in Whole embryo in situ hybridization (WISH) of 24 hpf wild-type zebrafish

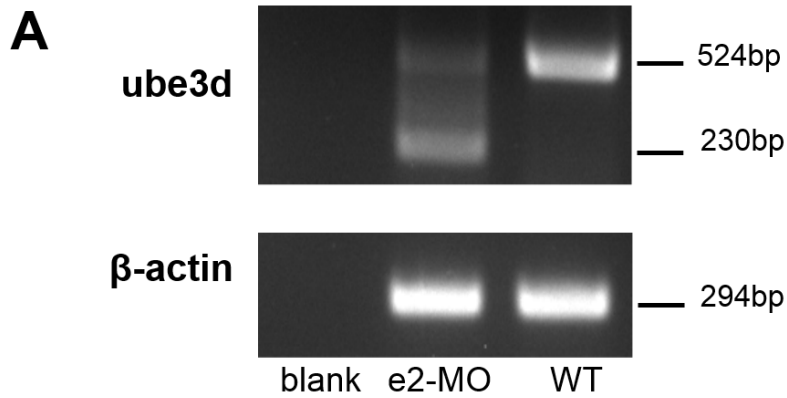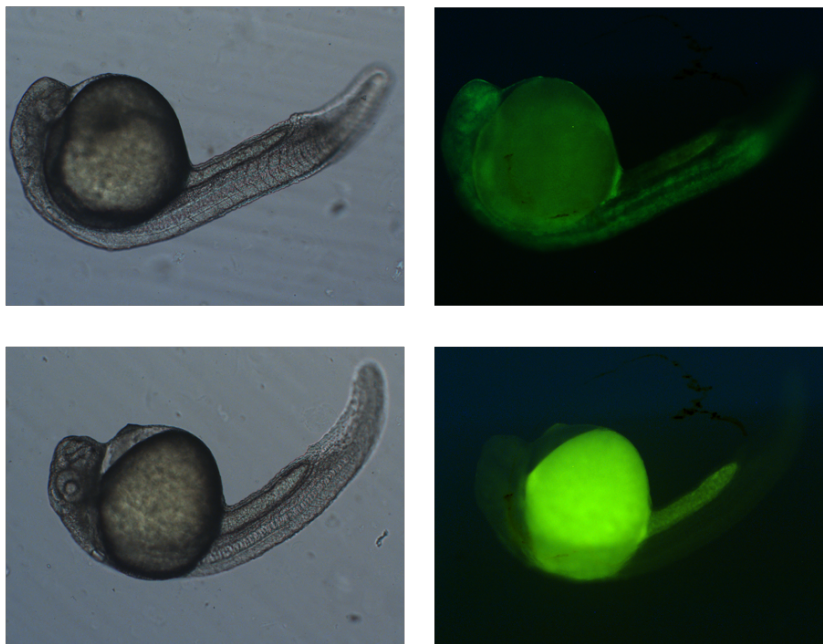

**Fig S2. Verification of the *ube3d* knockout efficiency in zebrafish.**

(A) RT-PCR was used to measure *ube3d* expression in 24 hpf wild-type zebrafish, e2 MO *ube3d*-knockdown zebrafish and blank control group (under normal circumstances, the length of *ube3d* is 524bp; due to the deletion length of exon 2 of *ube3d*, the length of e2 MO *ube3d*-knockdown zebrafish change to be 230bp). The following figure at right shows the bright field morphology of wild-type 24hpf and ATG-MO *ube3d*-knockdown zebrafish; the following figure on the left shows the expression of the ATG-MO target sequence (green fluorescence table) in the wild-type 24hpf and the ATG-MO zebrafish.

**A**

| 120 hpf    |            |             |            |             |
|------------|------------|-------------|------------|-------------|
| Adaptation | Light - on | Light - off | Light - on | Light - off |
| 10 min     | 10 min     | 10 min      | 10 min     | 10 min      |

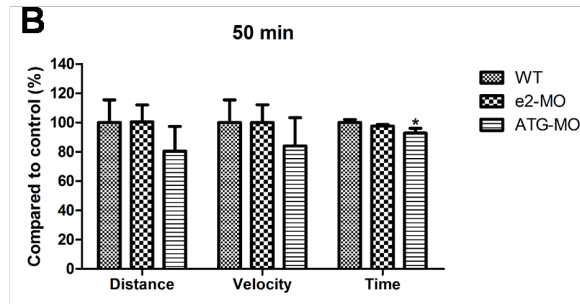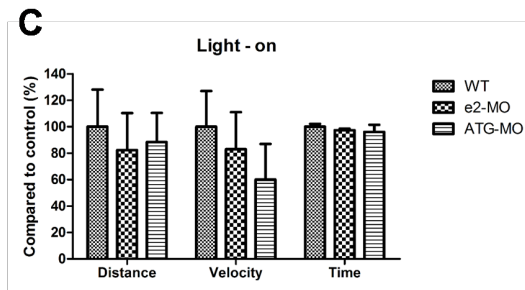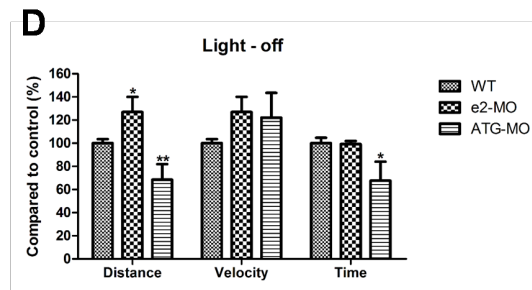

**Fig S3. Effect of ube3d gene knockout on the activity of zebrafish.** (A) Stimulus program in 120 hpf wild-type zebrafish, e2 MO ube3d-knockdown zebrafish and ATG-MO ube3d-knockdown zebrafish (total 50min: environmental adaptation-10min, bright stimulus-10min, dark stimulus-10min, bright stimulus-10min dark stimulus-10min, dark stimulus-10 min); (B) the comparison of the whole 50 minutes motor activity in wild-type zebrafish, e2 MO ube3d-knockdown zebrafish and ATG-MO ube3d-knockdown zebrafish; (C) the comparison of the motor activity under dark stimulation in wild-type zebrafish, e2 MO ube3d-knockdown zebrafish and ATG-MO ube3d-knockdown zebrafish; (D) the comparison of the motor activity under bright stimulus in wild-type zebrafish, e2 MO ube3d-knockdown zebrafish and ATG-MO ube3d-knockdown zebrafish ; All results were expressed as Mean  $\pm$  standard deviation (Mean SD). \* $P$  < 0.05, \*\* $P$  < 0.01.
